# Supplementary material for: Optimization of the Rheological Properties of Self-Assembled Tripeptide/Alginate/Cellulose Hydrogels for 3D Printing
Source: MDPI journal article supplement (doi:10.3390/polym14112229), 2022-05-30
Supplement: s1 [file s1]

## Supplementary information

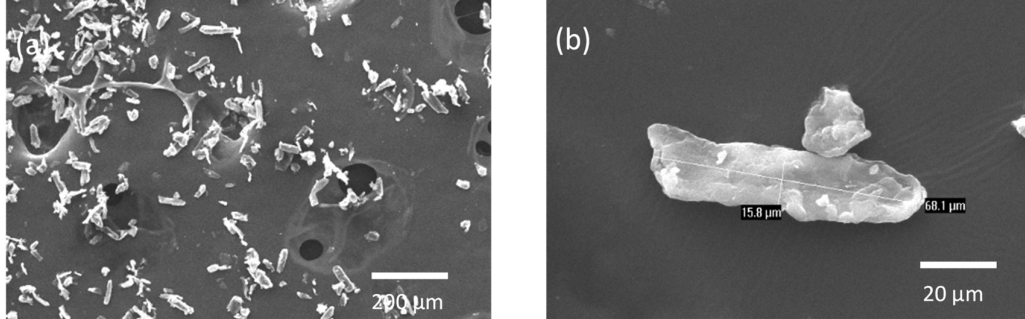

**Figure S1.** SEM images of MCC particles. **(a)** 100x magnification. **(b)** 1000x magnification.

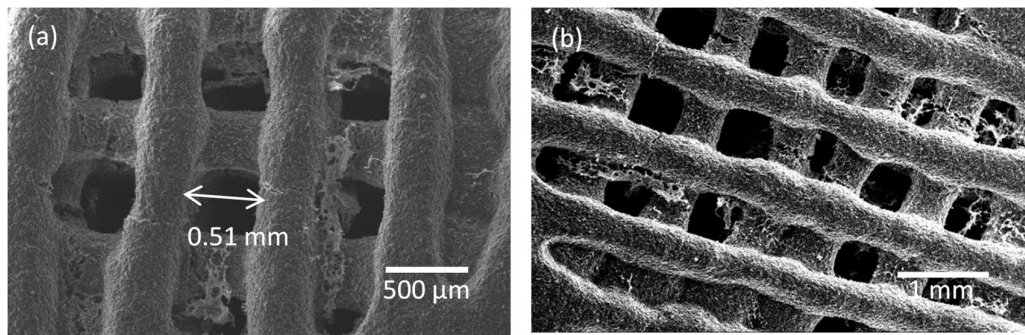

**Figure S2.** SEM images of the top part of the Alg\_MCC<sub>40</sub> scaffolds showing the pore width. **(a)** 35x magnification. **(b)** 25x magnification.

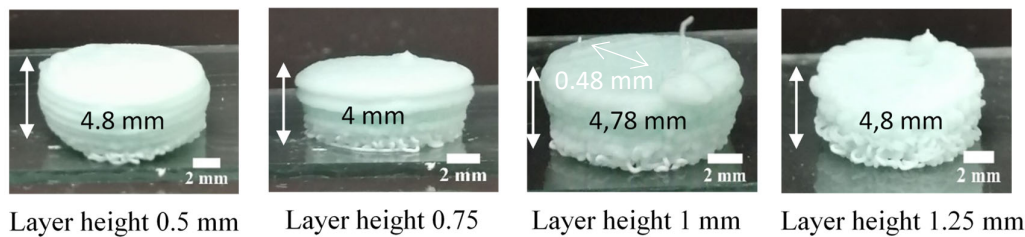

**Figure S3.** Scaffolds prepared with different layer height. Measurements of the total height of the scaffold were taken.

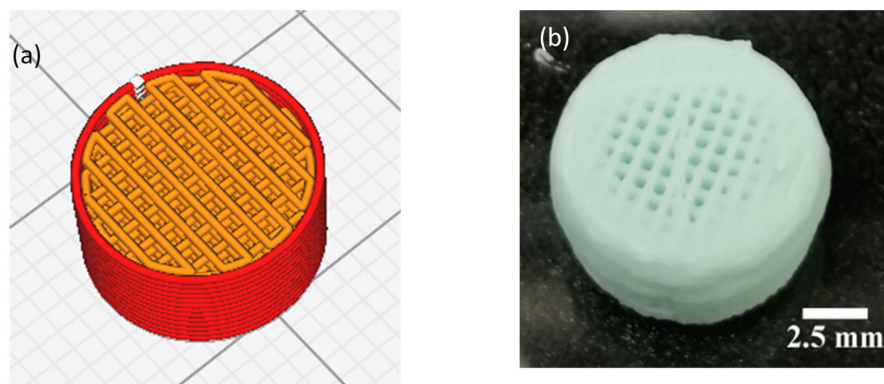

**Figure S4.** 3D printed scaffold. **(a)** 3D model employed for printing. **(b)** Scaffold obtained from 3D printing.

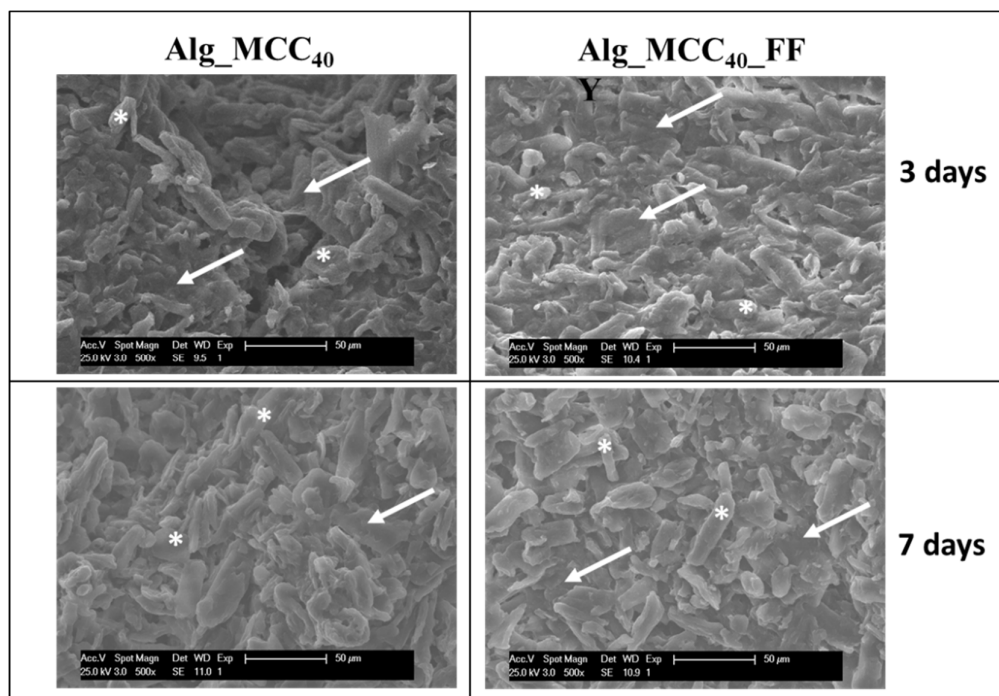

**Figure S5.** SEM images of the inner part of the scaffolds taken after 3 and 7 days of culture. The images show the characteristic composite microstructure with edged particles of the micro cellulose (white asterisks) and cells (white arrows) embedded within the alginate matrix.
